# Supplementary material for: Solvent-induced polymorphism in dipodal N-donor ligands containing a biphenyl core
Source: Royal Society of Chemistry journal article supplement (doi:10.1039/d3ra05713e), 2023-01-01
Supplement: d3ra05713e1.pdf [file d3ra05713e1.pdf]

# Solvent-induced polymorphism in dipodal N-donor ligands containing a biphenyl core

Simran Chaudhary, Dariusz Kędziera, Zbigniew Rafiński and Liliana Dobrzańska\*

## Supplementary Data

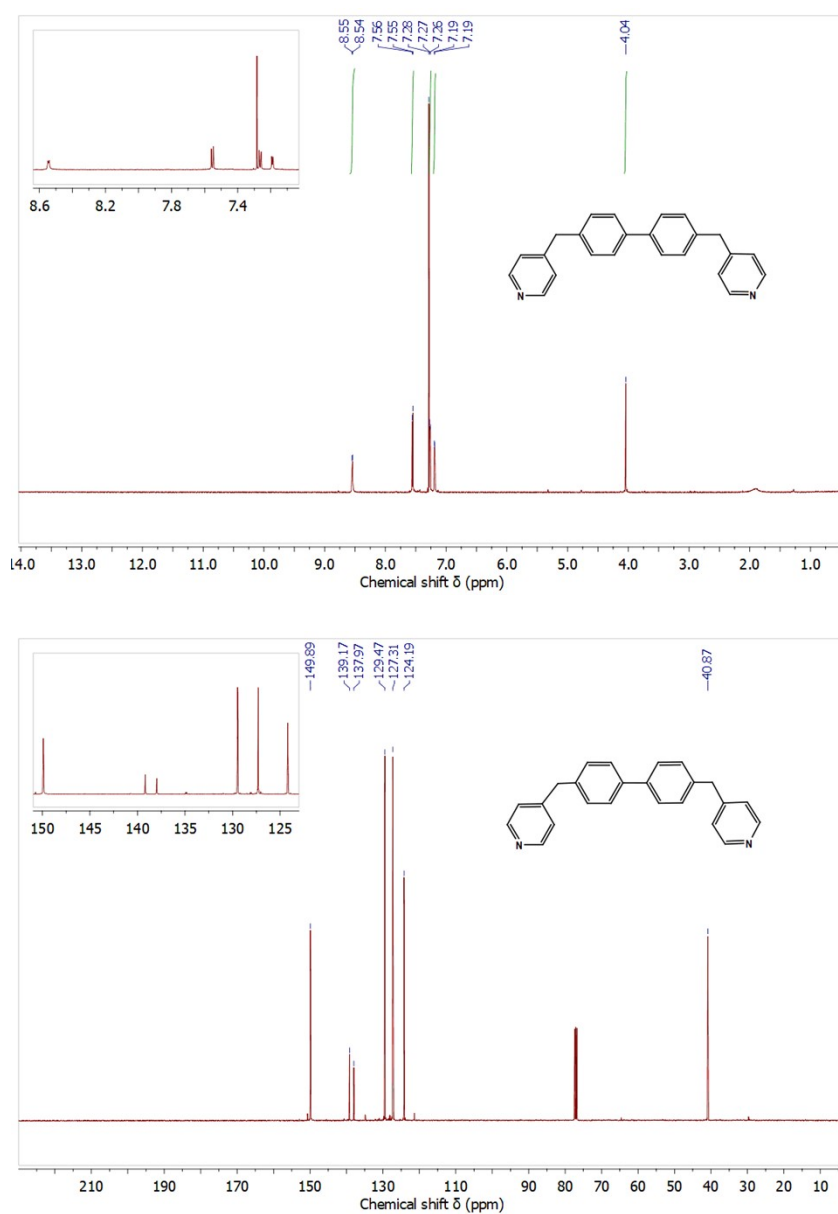

Figure S1 NMR spectra for 1.

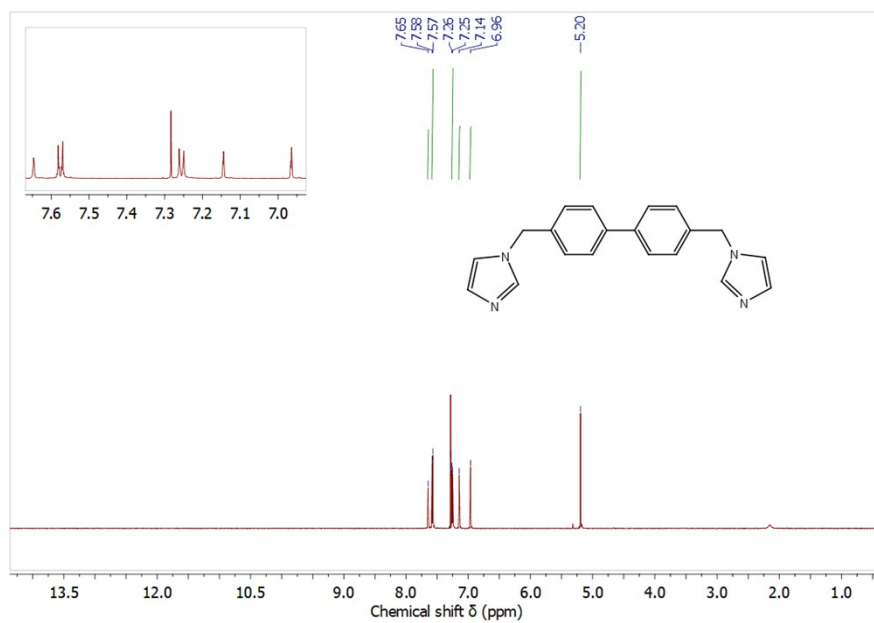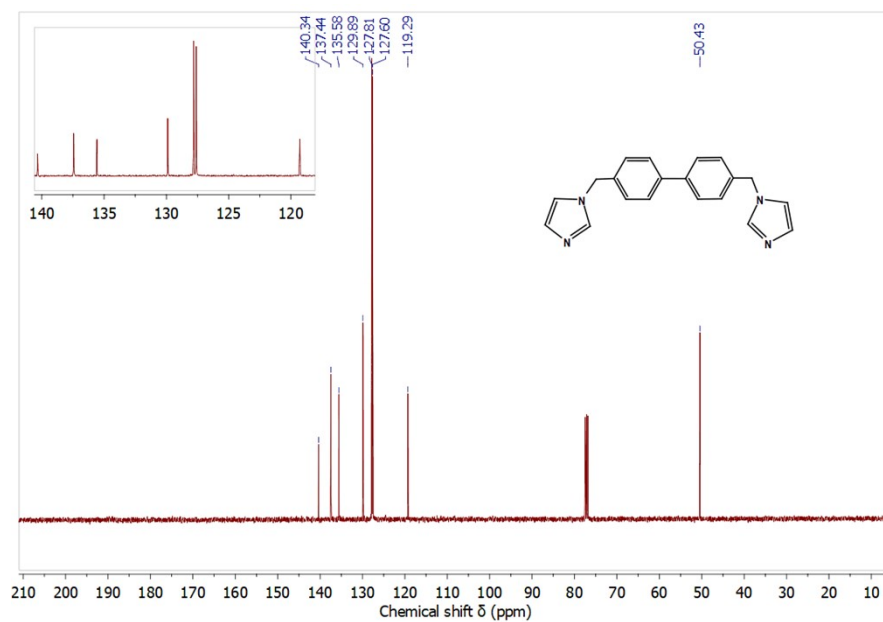

**Figure S2** NMR spectra for **2**.

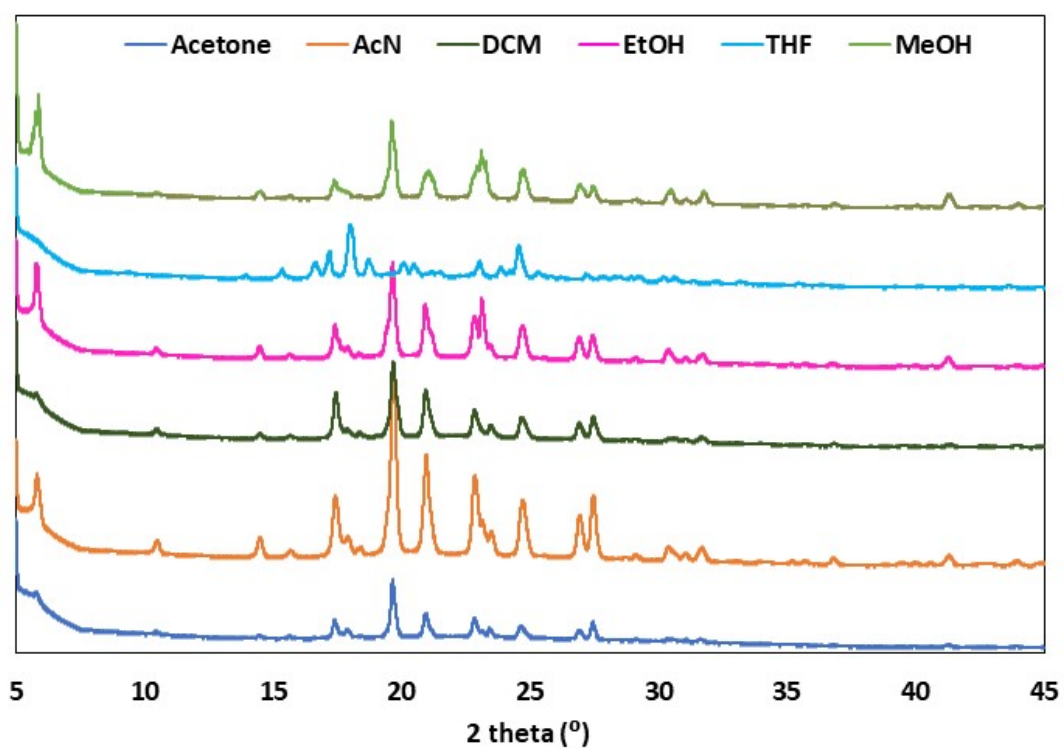

**Figure S3** Powder patterns obtained for **1** upon recrystallisation from a range of solvents.

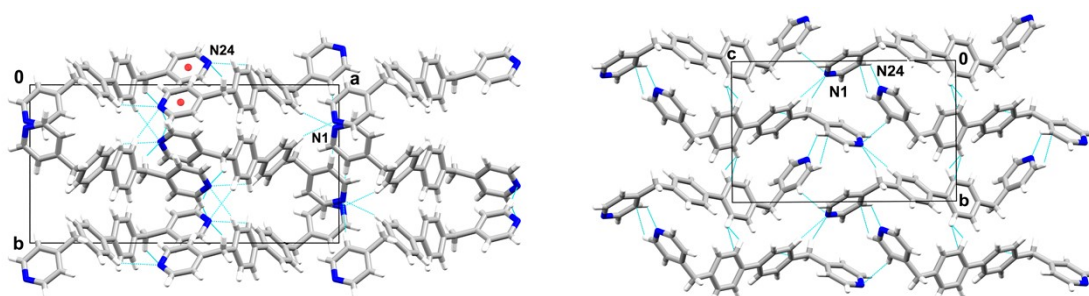

**Figure S4** Packing diagrams of **1a** (on the left) and **1b** (on the right). The N-H $\cdots$ N interactions present are shown in blue, two centroids (in red) indicate an exemplary pair of interacting aromatic rings ( $\pi$ - $\pi$  interactions).

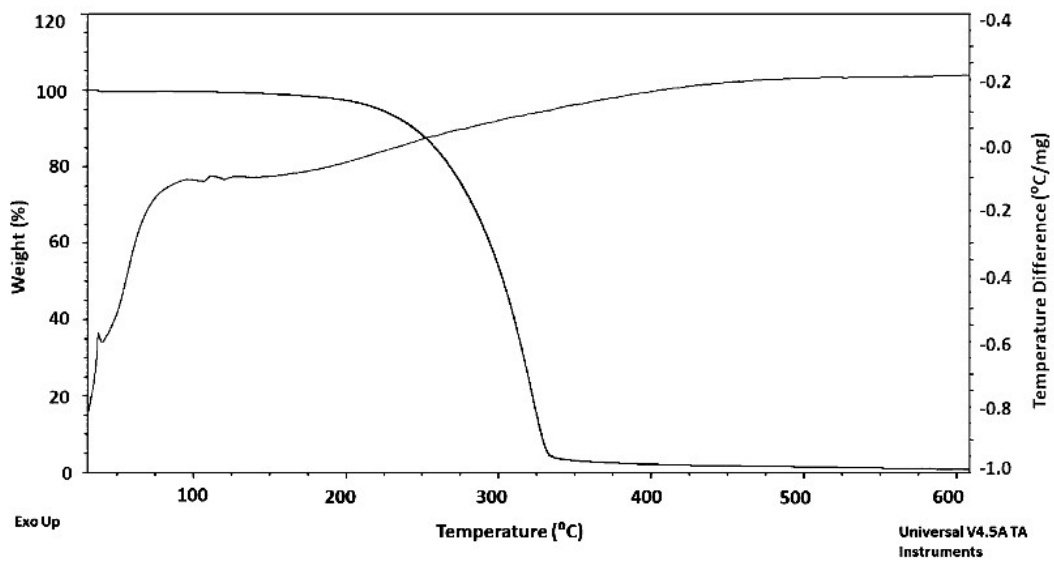

Figure S5 Thermogram of 1a.

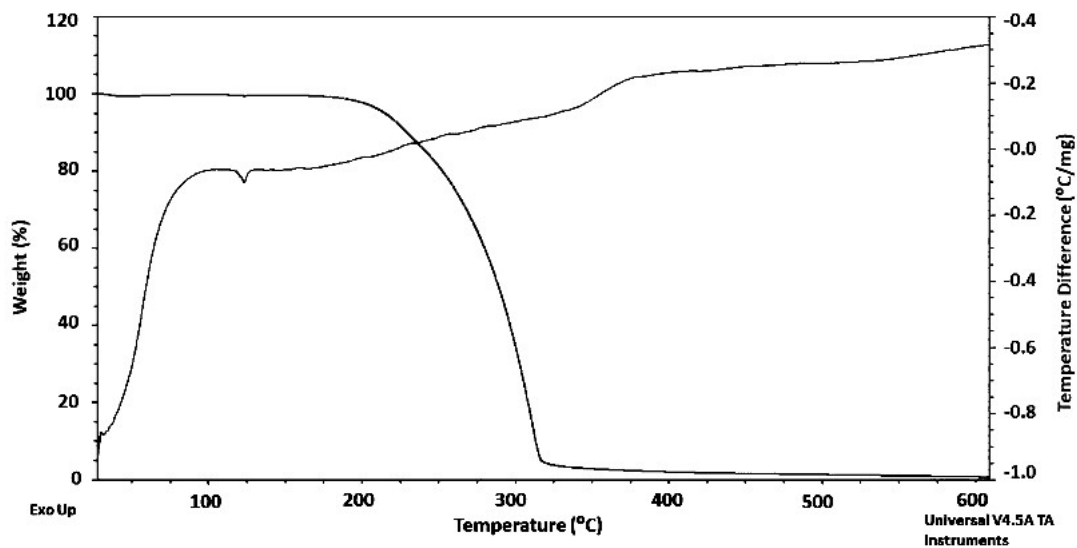

**Figure S6** Thermogram of **1b**.

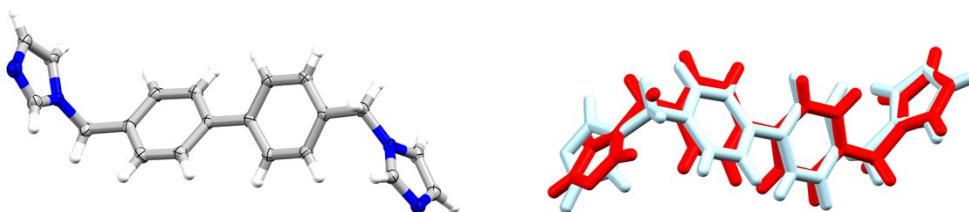

**Figure S7** Molecular structure of **2b** on the left; Overlay of **2b** (blue) with one of the disordered forms of **2a** (**2a1**) (red) (RMSD of 1.1590).

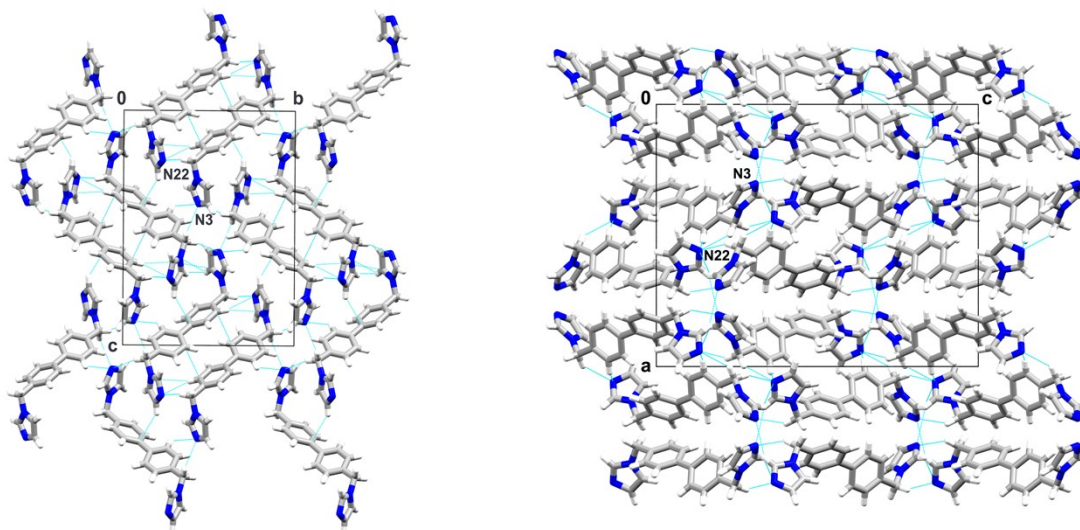

**Figure S8** Packing diagrams of **2b** (on the left) and **2c** (on the right). The N-H $\cdots$ N interactions present are shown in blue.

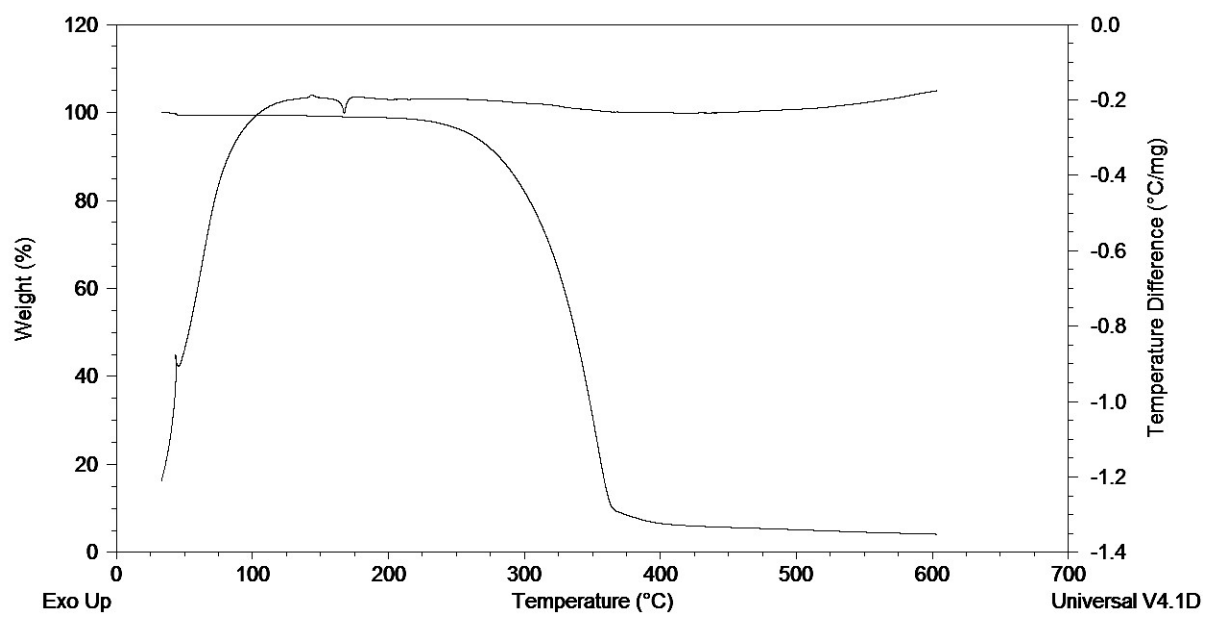

Figure S9 Thermogram of 2c.
